# Supplementary material
Source: publisher site journal article supplement (https://www.spandidos-publications.com/8078/downloadSupplementary)

Figure S1. Western blot analysis of EVs marker proteins. (A-C) Expression of (A) Alix (~96 kDa), (B) Flotillin-1 (~48 kDa) and (C) CD63 (~30-60 kDa) in plasma-derived EVs from HC and CC. Left panels show representative western blot bands; right panels display semi-quantitative analysis results based on band intensity (n=3; ns: no significant difference). EVs, extracellular vesicles; CC, cervical cancer; HC, healthy controls.

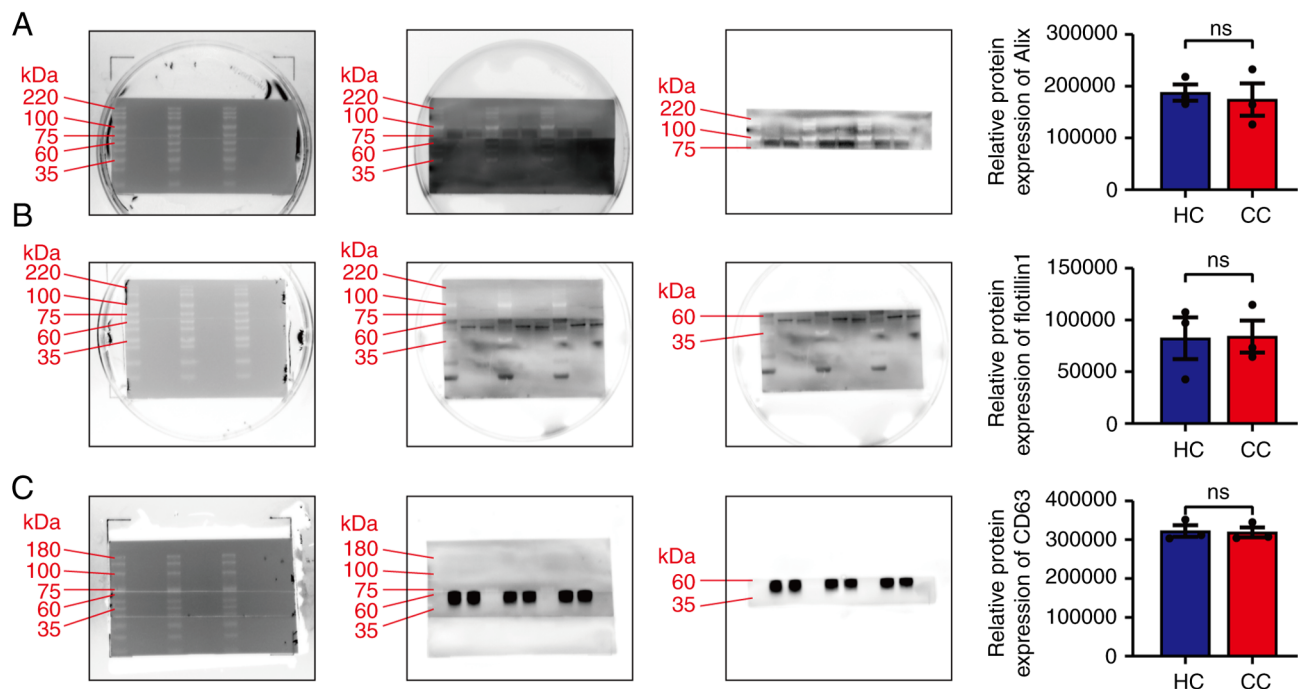

Supplement: Supplementary file 1 [file downloadSupplementary]
